# Supplementary material for: Development, Characterization and Resveratrol Delivery of Hollow Gliadin Nanoparticles: Advantages over Solid Gliadin Nanoparticles
Source: MDPI journal article supplement (doi:10.3390/foods12132436), 2023-06-21
Supplement: s1 [file s1]

Supplementary Information For

## Development, Characterization and Resveratrol Delivery of Hollow Gliadin Nanoparticles: Advantages over Solid Gliadin Nanoparticles

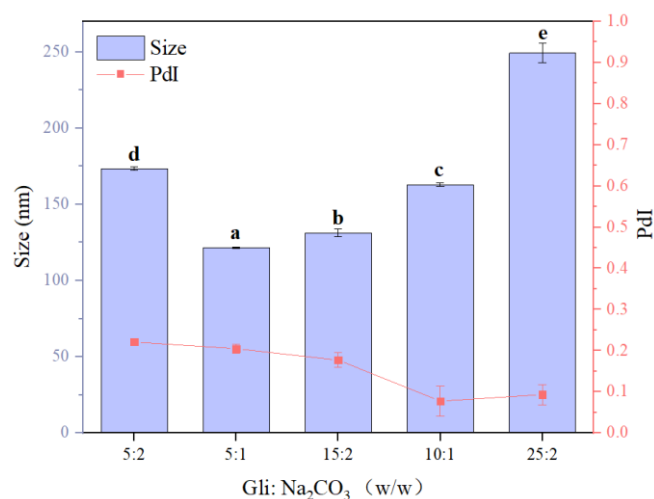

**Figure S1.** Effect of mass ratios of gliadin (Gli) to Na<sub>2</sub>CO<sub>3</sub> on particle sizes of hollow gliadin nanoparticles.

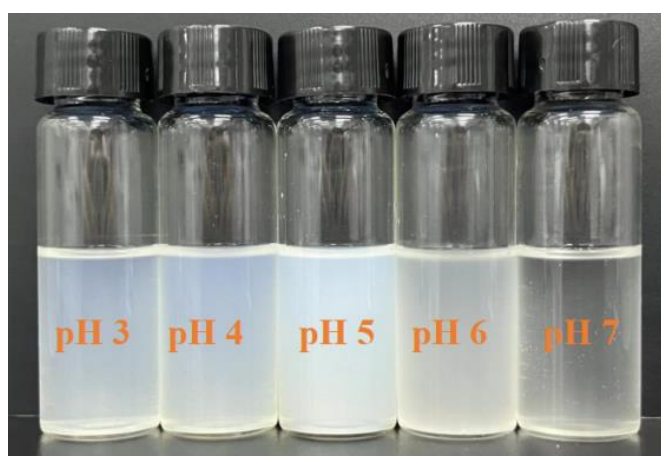

**Figure S2.** The digital images of resveratrol-loaded hollow gliadin nanoparticles at different pH values.

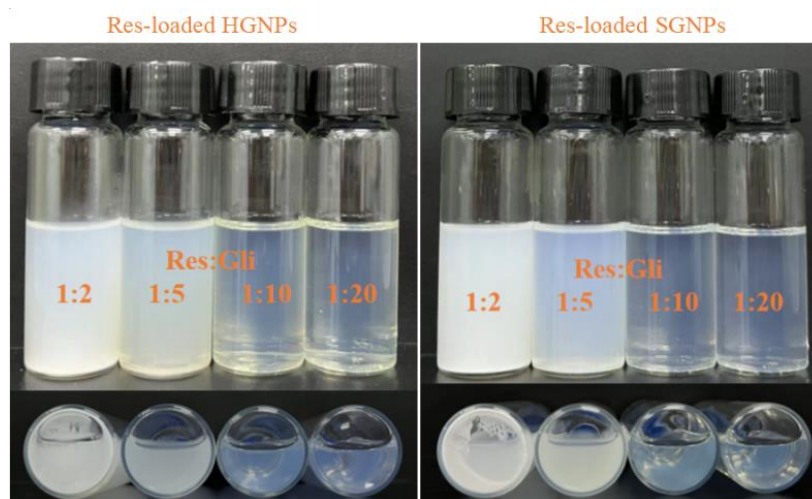

**Figure S3.** The digital images of resveratrol-loaded hollow gliadin nanoparticles (Res-loaded HGPNs) and resveratrol-loaded solid gliadin nanoparticles (Res-loaded SGNPs) at different mass ratios of resveratrol (Res) to gliadin (Gli).
